1 **Honey bees, *Apis mellifera*, are important pollinators of the highbush blueberry variety Ventura**

2 **despite the inability to sonicate**

3 **Honey bees are important pollinators of blueberries despite their inability to sonicate**

4 Keanu Martin<sup>1\*</sup>, Bruce Anderson<sup>1</sup>, Corneile Minnaar<sup>1</sup>, Marinus de Jager<sup>2</sup>

5 <sup>1</sup>Department of Botany and Zoology, Stellenbosch University, Matieland 7602, Cape Town, Western

6 Cape, South Africa

7 <sup>2</sup>Department of Conservation Ecology and Entomology, Stellenbosch University, Matieland 7602,

8 Cape Town, Western Cape, South Africa

9 \*Corresponding author: keanum@sun.ac.za

## 10 **Abstract**

11 Animal-mediated pollination is an essential ecosystem service which over a third of the world's  
12 agricultural crops depend on. Blueberry fruit production is highly dependent on pollinators and in  
13 their native range they are pollinated mostly by bumble bees (*Bombus* spp.). Demand for blueberries  
14 has increased in recent years due to their perceived health benefits. Consequently, blueberry  
15 cultivation has expanded well beyond their native range, including several regions where bumble  
16 bees are not present. In many areas, honey bees may be the only commercially available pollinators  
17 of blueberries because many countries ban the importation of bumble bees. This study aimed to  
18 determine the benefits of honey bee pollination on blueberry fruit quality and quantity for the  
19 variety Ventura by comparing yields of honey-bee-pollinated flowers to flowers where pollinators  
20 had been excluded. Honey bees significantly increased berry mass and diameter. Our results suggest  
21 that the presence of honey bee pollinators potentially increases revenue by approximately \$864  
22 501/ha in areas without bumble bees. We conclude that Ventura is reliably pollinated by honey  
23 bees, and that honey bee pollination may be a useful substitute for bumble bees in areas where  
24 bumble bees are absent. We also determined the extent to which blueberry yields could still be  
25 improved by comparing fruit quality and quantity under honey bee pollination to fruit quality and  
26 quantity achieved through ideal hand pollination. We found that blueberry yields may be still be  
27 significantly increased relative to ideal hand pollination and we discuss potential ways to improve  
28 the efficiency of honeybee pollination in the future. Additional research is required to study how  
29 beneficial honey bees are to fruit yield on varieties as the benefits of honey bees are likely to vary  
30 across different varieties.

## 31 Introduction

32 Over 30% of the world's agricultural crops depend on animal-mediated pollination, an essential  
33 ecosystem service which is valued at approximately €153 billion [1]. The dependence of crops on  
34 pollinators varies, with fruit formation in certain crops being extremely dependent on pollinators [2].  
35 For example, atemoya, Brazil nut, cantaloupe, cocoa, kiwi, macadamia nut, passion fruit, pawpaw,  
36 rowanberry, sapodilla, squashes and pumpkins, vanilla and watermelon, show a ca. 90% reduction in  
37 produce when pollinators are absent [2].

38 Blueberry production is also highly dependent on pollinators for the production of high-  
39 quality fruit [3–5]. This is partly a result of floral architecture, where the pollen of blueberry  
40 flowers is concealed within poricidal anthers, making pollen transfer both within and between  
41 flowers unlikely without pollinators. For example, Campbell *et al.* [6] found that blueberry fruit were  
42 ca. 47% heavier when plants had access to pollinators (including honey bees, *Bombus* spp., *H.*  
43 *laboriosa* and *Xylocopa* spp.), than when pollinators were excluded. Effective pollinators of  
44 blueberries are typically large bees such as bumble bees [7–10], blueberry bees [6,11] and mining  
45 bees [7,8], which are able to extract pollen from anthers by vibrating their bodies at high frequency.  
46 This causes pollen to dehisce from the pores inside the blueberry anthers [11].

47 This “buzz pollination” strategy is employed by approximately 15,000–20,000 plant species  
48 [12,13]. Buzz pollination may have evolved to exclude less efficient or wasteful pollinators, such as  
49 honey bees (*Apis mellifera*), which are unable to obtain pollen from these specialized anthers  
50 through buzzing [7,10,12]. For example, Javorek *et al.* [7] found honey bees deposited approximately  
51 three times less pollen on blueberry stigmas during a single visit than bumble bees. However, the  
52 large numbers of foragers in honey bee colonies may enable effective pollination of blueberry  
53 flowers, as they may achieve increased flower visitation rates relative to bumble bees. This may  
54 explain why many commercial blueberry farmers completely, or partially, depend on honey bees as

55 pollinators. Even within the native range of bumble bees, North American blueberry farmers  
56 frequently add honey bee hives to supplement bumble bee pollination [4,14–16].

57         The pervasive use of honey bees in the blueberry industry may also be a result of the  
58 prohibition on importation and use of non-native, commercially-produced bumble bees in parts of  
59 USA and many other regions where bumble bees are not native, such as southern Africa and  
60 Australasia [17,18]. These strict laws, prohibiting the movement of bumble bees, are in place  
61 because their introduction can have catastrophic effects on native fauna and flora [19,20]. For  
62 example, *Bombus ruderatus* and *Bombus terrestris* were introduced to Chile for agricultural  
63 pollination; these species have subsequently invaded southern South America, including Argentina,  
64 which has since banned commercial importation of bumble bees [21–24]. In Argentina, the highly  
65 invasive *Bombus terrestris* has caused a reduction in geographic range of the largest bumble bee in  
66 the world, and the sole native Patagonian bumble bee, *Bombus dahlbomii* [22]. Other potential  
67 impacts include pathogen transmission to native bumble bees, nectar robbing and flower damage  
68 [21,22,24]. Despite the potentially harmful effects of introducing bumble bees for agricultural  
69 pollination, the widely-held contention that honey bees are inferior pollinators of blueberries, drives  
70 the industry to place pressure on governments to allow bumble bee importation.

71         To alleviate the temptation to introduce bumble bees into new areas, it is pertinent to  
72 quantify the actual benefit of honey bees as commercial pollinators of blueberries, so that policies  
73 regarding the importation of bumble bees are based on substantive evidence and not impressions.  
74 Further, it may be possible to optimize the efficiency of honey bee pollination, so that the  
75 advantages of introducing bumble bees to new ranges are reduced. It is therefore important to  
76 quantify how well different blueberry varieties perform under honey bee pollination, while also  
77 estimating the potential for improvement by comparing blueberry yields under honeybee pollination  
78 to yields achieved under optimal hand pollination.

79           We aim to study the effects of honey bees on the production of blueberries in the variety  
80 Ventura, which is extensively planted in South America and South Africa [25]. More specifically, we  
81 compare the benefits (in terms of fruit quality, yield and revenue) of having honey bees as the only  
82 pollinators with blueberry yields achieved in the absence of pollinators. Despite their inability to  
83 buzz-pollinate, honey bees still transfer pollen between flowers and are capable of increasing fruit  
84 production in a variety of blueberry crops [4,5,26,27]. Consequently, we hypothesize that managed  
85 honey bees significantly increase fruit quality (i.e., mass and diameter) and decrease fruit  
86 development time, compared to flowers without access to pollinators. Next, we determine whether  
87 there is room to improve blueberry yields beyond that which is achieved when honey bee pollinators  
88 are allowed access to flowers. Although honey bees can transfer blueberry pollen between flowers  
89 [27], we expect that the inefficiency of honey bee pollination on blueberry flowers should result in  
90 significant potential for improvement, and consequently fruit quality and yield resulting from honey  
91 bee pollination should be lower than by hand pollination, which maximizes the transfer of pollen.

## 92 **Materials and Methods**

93 This study was conducted in a one-hectare block of Ventura plants (7500) stocked with 15 honey bee  
94 hives on Backsberg blueberry farm (Western Cape, South Africa, 33°48'30.7"S 18°54'09.8"E). Our  
95 experiment consisted of three treatments: pollinator exclusion, open honey bee pollination, and  
96 optimized pollination (by hand). By comparing fruit quality among these three treatments, we  
97 determined whether the addition of honey bees was beneficial to blueberry production as well as  
98 the extent to which pollination by honey bees could potentially be improved upon (see Fig. 1 and  
99 treatment descriptions below). The three treatments were replicated across 20 plants, with each  
100 treatment applied once to each individual plant.

101

102 **Fig 1:** Hypothetical figure showing how the three treatments (pollinator exclusion, honey bee pollination and  
103 optimized pollination) may be useful metrics in determining the benefits of using honey bees to pollinate  
104 crops, and how yields could potentially be increased under more optimal pollination environments.

105

### 106 **Benefit of honey bees**

107 To determine whether honey bees are commercially beneficial pollinators for berry production in  
108 Ventura, we compared blueberry production in plants where all pollinators were excluded  
109 (pollinator exclusion) with blueberry production in plants where honey bees had access to flowers  
110 (honey bee pollination) (See Fig. 1).

#### 111 ***Pollinator exclusion (bagged)***

112 Pollinators were excluded from visiting some blueberry flowers by placing a fine mesh bag over 20  
113 individual virgin flowers (one flower per plant). Consequently, seed production in this treatment was  
114 the result of autonomous pollination and/or parthenocarpy (the production of fruit in the absence of  
115 fertilization), and not pollinator visitation. This provides an estimate of the yields expected in the

116 absence of pollinators, and we expect that this should result in the poorest yield of our treatments,  
117 which we have termed “minimum yield”. Once flowers wilted, the bags were removed, and fruit  
118 maturation was allowed to continue normally.

### 119 ***Honey bee pollination (control)***

120 Some flowers were left unbagged, allowing access to commercial honey bees placed on the farm. In  
121 South Africa, honey bees are generally the only pollinators observed on blueberries. The hive  
122 densities used for this treatment were 15 hives/ha, which corresponds to the densities of hives  
123 actually used by commercial blueberry farms [15,27,28]. Each flower was labelled to distinguish its  
124 fruit from other treatments. This treatment provides an estimate of the yield resulting from honey  
125 bee pollination and is expected to be similar to yields currently obtained by farmers of the Ventura  
126 variety across South Africa (realized yield).

127

### 128 **Pollination deficit**

129 To determine the extent to which honey bee pollination can potentially be improved, we compared  
130 the honey bee pollination treatment (above) to a hand-pollinated treatment (optimized pollination).  
131 We assumed that hand pollination would result in the best fruit production possible by maximizing  
132 the deposition of pollen.

### 133 ***Optimized pollination (hand pollination)***

134 Prior to hand-pollination, Ventura flowers were emasculated. We did this by removing part of the  
135 corolla with a scalpel, before removing all stamens with a pair of fine forceps, thus ensuring that no  
136 self-pollination could take place. To ensure that the experimental flowers were virgin, buds that  
137 were about to open were bagged three days before hand pollination. The day before pollination,  
138 pollen was collected from pollen donor flowers (approximately five flowers per pollen application)  
139 [3]. Pollen was extracted from donor flowers by removing the corolla with a scalpel and agitating the

140 anthers with forceps, causing the poricidal anthers to release pollen into a Petri dish. Pollen from  
141 donor flowers on different individual plants was mixed together so that recipient flowers received  
142 pollen from multiple donors. This pollen mix was applied to recipient stigmas by dipping the stigma  
143 into the Petri dish containing pollen, and visually confirming that the stigma was saturated with  
144 pollen. Such careful hand pollination is likely to result in the maximum yield possible. Following hand  
145 pollination, a fine mesh bag was placed over hand-pollinated flowers to prevent honey bees from  
146 depositing additional pollen of unknown origin onto the stigma. This bag was again removed after  
147 the flower wilted.

### 148 **Measurements of fruit quality**

149 After pollination treatments were applied, we checked fruit development once a week to determine  
150 whether fruit were mature and ready for fruit quality measurement. Fruits were considered mature  
151 when the entire fruit turned a uniform dark blue. Mature fruit were harvested by hand and  
152 subsequently weighed, and the diameter of each fruit was measured on the day it was harvested. By  
153 checking fruit every week, we could also determine the developmental period for each fruit (the  
154 number of weeks from pollination to harvesting) for each treatment. Apart from fruit mass and  
155 diameter, the developmental period is an important determinant of fruit quality, as early fruit are  
156 more valuable than late fruit; earlier fruit can be sold at higher prices when market demand is not  
157 saturated [3,29]. The percentage fruit set per treatment was also calculated.

### 158 **Estimating the economic impact of honey bees**

159 In addition to fruit quality, we also determined how differences in pollination treatments could  
160 translate into differences in revenue gained. Firstly, to estimate the number of flowers, and thus  
161 potential fruits per plant, we used a constant flower number of 11 016 per plant [15]. This number  
162 serves only as an estimate of the total flowers for the highbush variety, Ventura, since we were  
163 unable to perform flower counts on our experimental plants. To calculate fruit yield per plant, we  
164 took the product of 11 016, the proportion of fruit set, and the predicted mass of fruits (taken from



165 our linear mixed-effects model, see below) produced by individual plants for each treatment. Fruit  
166 yield allows us to determine whether differences between treatments found in fruit quality actually  
167 translates to yield, as it takes into account flowers that did not set fruit set as well. To calculate the  
168 per-hectare economic value of fruit for each treatment, we multiplied yield per plant by the number  
169 of plants per hectare and by the US dollars obtained per kilogram of fruit (\$7.48) [30] (Eq. 1).

$$170 \quad \text{Revenue} = \text{Yield per plant} \times \frac{\text{Plants}}{\text{ha}} \times \frac{\text{US\$}}{\text{kg}} \quad (\text{Equation 1})$$

171

## 172 **Statistical analyses**

173 To test for differences in fruit mass, diameter, and developmental period between treatments, we  
174 used a linear mixed-effects model with treatment nested in plant ID as the repeated random factor.  
175 Linear contrasts (Tukey) were used to test for treatment differences. To test how well our model  
176 explained the variance in our data, we used Nakagawa  $R^2$  values [31], which provides both  
177 conditional variance ( $R^2c$ ) and marginal variance ( $R^2m$ ) estimates than can be equated to traditional  
178  $R^2$  values. Conditional  $R^2$  values show the variance explained by the entire model (fixed effects and  
179 random effects), whereas marginal  $R^2$  values show the variance explained by the random effects  
180 alone. The fixed effect was treatment and the random effect was treatment nested in plant ID. To  
181 test the overall effect of treatment on fruit set, we performed a log-likelihood ratio test between  
182 two mixed-effects logistic regression models, one with and one without treatment as a fixed effect.  
183 To test for differences in fruit yield (see calculation above) between treatments, we used a linear  
184 model. All statistical analyses were conducted in R (version 3.3.2) [32] using the packages nlme [33],  
185 multcomp [34], ggplot2 [35], sjPlot [36], car [37], lme4 [38], grid [32], gridExtra [39], lattice [40],  
186 MuMIn [41], plyr [42] and plotrix [43].

## 187 Results

### 188 Benefit of bees

189 The linear mixed-effects model explained the majority of the conditional variance for developmental  
 190 period ( $R^2c=0.999$ ). The model also accounted for some of the marginal variance in developmental  
 191 period ( $R^2m=0.283$ ), demonstrating that individual plants had different responses depending on  
 192 treatment. The presence of honey bee pollinators did not significantly decrease the ripening period  
 193 of blueberry fruits in comparison to treatments where honey bees were excluded (Table 1, Fig 2A).

194

195 **Fig 2:** A) Mean number of weeks needed for the fruit to ripen for each treatment. B) The mean mass of fruits for  
 196 each treatment. C) The mean diameter of fruits for every treatment. D) Percentage fruit set for each treatment.  
 197 E) The mean yield per plant for each treatment. Letters indicate significance ( $p<0.05$ ) of linear contrasts (Tukey  
 198 HSD). Error bars indicate standard error. BB = benefit of bees, this is the percentage difference between flowers  
 199 with no access to pollinators compared to flowers which had access to honey bees. PD = pollination deficit, this  
 200 is the percentage difference between flowers with access to honey bees compared to flowers were hand  
 201 pollinated.

202

203 **Table 1:** Outcome of three pollination treatments on blueberry fruit ripening, quality and yield.

|                 | Benefit of bees (BB) | Pollination deficit (PD) | Pollinator exclusion – optimized pollination |
|-----------------|----------------------|--------------------------|----------------------------------------------|
| Ripening period | $z=-1.505, p=0.2885$ | $z=-2.734, p=0.0173$     | $z=-4.165, p<0.001$                          |
| Mass            | $z=4.346, p<0.001$   | $z=2.449, p=0.0381$      | $z=6.771, p<0.001$                           |
| Diameter        | $z=4.617, p<0.001$   | $z=2.338, p=0.0508$      | $z=6.938, p<0.001$                           |
| Yield           | $t=4.870, p<0.001$   | $t=3.164, p=0.0078$      | $t=7.992, p<0.001$                           |

204 Significance indicated by bold type

205 The linear mixed-effects model explained the majority of conditional variance for both mass  
 206 ( $R^2c=0.999$ ) and diameter ( $R^2c=0.999$ ). The model explained a large proportion of the marginal  
 207 variance for mass ( $R^2m=0.503$ ) and diameter ( $R^2m=0.517$ ), suggesting variation in individual plant

208 responses in fruit mass and diameter per treatment. The presence of honey bees substantially  
209 increased fruit mass (mean  $\pm$  SE fruit mass = 2.89g  $\pm$  0.23g, Table 1), with a 72% increase in mass per  
210 fruit compared to treatments without access to pollinators (mean  $\pm$  SE fruit mass = 1.68g  $\pm$  0.25g, Fig  
211 2B). Similarly, honey bees also caused a mean increase of 4mm (31%) per fruit (mean  $\pm$  SE fruit  
212 diameter = 18.69mm  $\pm$  0.65mm) compared to treatments where honey bees were excluded (mean  $\pm$   
213 SE fruit diameter = 14.32mm  $\pm$  0.69mm, Fig 2C, Table 1). There was no difference in the fruit set of  
214 flowers with access to honey bees relative to flowers which had no access to honey bees or hand  
215 pollinated flowers (*Chi-square*=1.36, *df*=4, *p*=0.507) (Fig 2D).

216 The beneficial effects of honey bees on fruit mass and fruit set also translated into  
217 differences in total yield as calculated using Isaac's [15] average flowers produced per plant, with the  
218 linear model explaining 54% of the variance in yield ( $R^2=0.5355$ ,  $F_{(2,44)}=27.52$ ,  $p<0.001$ ). Here, yield  
219 increased substantially (152%) from 10.11kg  $\pm$  2.2kg (mean  $\pm$  SE predicted plant yield) per plant  
220 when pollinators were excluded to 25.52kg  $\pm$  3kg (mean  $\pm$  SE predicted plant yield) when honey bees  
221 were allowed to forage on blueberries (Table 1, Fig 2E). Using a value of \$7.48/kg [30] of blueberries  
222 and a density of 7500 plants per hectare, adding honey bee hives in areas lacking natural blueberry  
223 pollinators can potentially increase blueberry revenue by \$864 501/ha (152%) compared to if  
224 pollinators were excluded.

225

## 226 **Pollination deficit**

227 Hand pollination significantly shortened the ripening period of blueberry fruit by approximately two  
228 weeks or 15% (Table 1), from 15  $\pm$  0.65 weeks (mean  $\pm$  SE weeks to ripen) when pollinated by honey  
229 bees to 13  $\pm$  0.64 (mean  $\pm$  SE weeks to ripen) when pollinated by hand (Fig 2A). Hand-pollinated  
230 fruits were significantly heavier (Table 1) at 3.69g  $\pm$  0.23g (mean  $\pm$  SE fruit mass), than flowers  
231 pollinated by honey bees at 2.89g  $\pm$  0.23g (mean  $\pm$  SE fruit mass, Fig 2B), a ca.27% increase. Hand

232 pollination did not significantly increase the size of fruits compared to fruits resulting from honey  
233 bee pollination (Table 1, Fig 2C).

234           However, when both mass and fruit set were incorporated into a model to calculate total  
235 yield, hand pollinations resulted in significantly greater yields than honey bee pollination (Table 1).  
236 Calculated per plant, optimizing pollination (i.e. hand pollination) can potentially increase yields  
237 from  $25.52\text{kg} \pm 3\text{kg}$  (mean  $\pm$  SE predicted plant yield, after honey bee pollination) to  $34.47\text{kg} \pm 2.9\text{kg}$   
238 (mean  $\pm$  SE predicted plant yield, Fig. 2E), approximately 35%. This could lead to additional revenue  
239 amounting to \$502 095/ha (35%).

## 240 Discussion

241 This study revealed that the pollination environment has the potential to strongly affect the quality  
242 of fruit produced by the highbush blueberry variety Ventura. In particular, yields are greatly  
243 increased by the addition of honey bees in areas where bumble bee pollinators do not occur  
244 naturally, and importation is illegal. Honey bees were the only pollinators at this site and therefore  
245 the effects shown are a direct result of access to honey bees, rather than other unaccounted wild  
246 pollinators. This provides valuable information for the pollination of commercial blueberries,  
247 particularly with respect to the underutilized role played by honey bees, and suggests some  
248 important directions for research on blueberry pollination.

249 We show for the first time that Ventura can produce fruit without pollinators. However,  
250 these fruits are of lower quality than the fruits of flowers exposed to honey bee pollinators. This  
251 ability is not unique to Ventura, as other highbush blueberry varieties can also produce fruit in the  
252 absence of pollinators. However, these fruits are also of noticeably poorer quality than fruits  
253 produced by flowers with access to pollinators [5,6,15]. The presence of honey bees significantly  
254 increased blueberry yields by improving fruit quality through greater fruit diameter and mass (Fig. 2).  
255 This shows that despite honey bees' inability to buzz-pollinate, they do extract blueberry pollen from  
256 anthers and transfer it to stigmas. Thus, in areas lacking native blueberry pollinators, the addition of  
257 honey bees may increase blueberry yields by more than 150% (Fig 2E). This translates to an  
258 economic value of approximately \$864 501/ha. Consequently, honey bees may be extremely  
259 beneficial, potentially eliminating the need to import bumble bees in countries which do not have  
260 native blueberry pollinators.

261 Despite this benefit, there is still a pollination deficit of approximately 27%, which suggests  
262 that there may be room to optimize pollination. However, it is unclear exactly why honeybee  
263 pollination results in sub-optimal fruit yields and whether native bumble bee pollinators result in  
264 greater yields than high densities of honey bees. These represent important directions for future

265 research on blueberry pollination. There could be several reasons for the sub-optimal yields  
266 produced by honey bee pollination and future research needs to concentrate on these to optimize  
267 the pollination environment. Below we discuss four potential reasons for sub-optimal yields, each of  
268 which should be targeted in future studies in an attempt to improve blueberry yields.

### 269 **Hand pollinations are not a realistic maximum yield**

270 The magnitude of the pollination deficit is contingent on what honey bee-pollination yields are being  
271 compared with (in this case hand-pollinations). It is possible that blueberry yields resulting from  
272 honey bee pollination are already close to the maximum that can be achieved through animal  
273 pollination and that no amount of tinkering is likely to reduce this perceived deficit. For example,  
274 pollination by bumble bees may not result in smaller pollination deficits than pollination by honey  
275 bees. Unfortunately, there is a lack of data comparing blueberry fruit yields after pollination by  
276 different bee species to fruit yields after hand pollinations. Consequently, it is unclear how  
277 pollination deficits under different pollinator environments are likely to vary and if honey bee hives  
278 are any less effective than bumble bee colonies as commercial pollinators of blueberries. This  
279 represents an important first step in determining whether the pollination deficit can be reduced.

### 280 **Blueberry attractiveness**

281 If honey bee pollination really is less effective than other modes of pollination, it may be the result  
282 of low visitation rates to blueberry flowers. Blueberry flowers may be less attractive to honeybees  
283 than wild or other agricultural flowers that surround blueberry farms. Low attractiveness relative to  
284 other flowers may occur because blueberries are adapted to larger bees and both their nectar and  
285 pollen rewards may be more difficult for honeybees to access [44]. Ventura has a long floral tube  
286 length ( $11.39\text{mm} \pm 0.4\text{mm}$ ) which may make it difficult for honey bees to access nectar at the  
287 bottom of the flower as bees would need to insert nearly half of their bodies into the flower to reach  
288 the nectar. This increases honey bees energy expenditure and may cause honey bees to search for

289 more favourable flowers. A possible way to overcome this is through the development of varieties  
290 with shorter or wider corollas.

291

### 292 **Honeybees may not pick up pollen**

293 High visitation by honey bees may still result in low fruit set if they forage for nectar but remove very  
294 little pollen from the poricidal anthers. This could occur because honey bees are not capable of buzz  
295 pollinating and hence extract few pollen grains per visit [7,10,12]; honey bees do appear to deposit  
296 very few pollen grains per visit to blueberry flowers [7]. Other than trying to develop varieties with  
297 pollen which is more easily released, there is very little one can do to improve this potential  
298 problem.

299

300 Further research needs to explore the efficiency of honey bees as commercial pollinators of different  
301 blueberry varieties, especially comparative studies with bumble bees. More detailed investigations  
302 of behavioural interactions of honey bees with blueberry flowers may highlight traits which  
303 determine honey bee preferences for different varieties. Studies on the mechanical fit of honey bees  
304 to the flowers of different blueberry varieties may also illuminate which varieties are best suited to  
305 honey bee pollination.

## 306 **Acknowledgements**

307 We would like to thank BerryWorld South Africa for providing access to the Backsberg farm. We  
308 would also like to thank our funders, the National Research Foundation (South Africa) under grant  
309 number 112277 and South African Berry Producers Association (KM), the Claude Leon Foundation  
310 (MDJ), the Eva Crane Trust (ECTA\_20170609 to CM and ECTA\_20170905 to MDJ) and the National  
311 Research Foundation (South Africa) (105987 to BA and 111979 to CM).



## 312 References

- 313 1. Gallai N, Salles JM, Settele J, Vaissière BE. Economic valuation of the vulnerability of world  
314 agriculture confronted with pollinator decline. *Ecol Econ.* 2009;68: 810–821.
- 315 2. Klein A-M, Vaissiere BE, Cane JH, Steffan-Dewenter I, Cunningham SA, Kremen C, et al.  
316 Importance of pollinators in changing landscapes for world crops. *Proc R Soc B Biol Sci.*  
317 2007;274: 303–313.
- 318 3. Dogterom MH, Winston ML, Amy M. Effect of pollen load size and source (self, outcross) on  
319 seed and fruit production in highbush blueberry cv. “Bluecrop” (*Vaccinium corymbosum*;  
320 Ericaceae). *Am J Bot.* 2000;87: 1584–1591.
- 321 4. Aras P, de Oliveira D, Savoie L. Effect of a honey bee (Hymenoptera: Apidae) gradient on the  
322 pollination and yield of lowbush blueberry. *J Econ Entomol.* 1996;89: 1080–1083.
- 323 5. MacKenzie K. Pollination requirements of three highbush blueberry cultivars. *Journal of*  
324 *American Society of Horticultural Science.* 1997. pp. 891–896.
- 325 6. Campbell JW, Kimmel CB, Bammer M, Stanley-Stahr C, Daniels JC, Ellis JD. Managed and wild  
326 bee flower visitors and their potential contribution to pollination services of low-chill  
327 highbush blueberry (*Vaccinium corymbosum* L.; Ericales: Ericaceae). *J Econ Entomol.*  
328 2018;111: 2011–2016.
- 329 7. Javorek S, MacKenzie K, Vander Kloet S. Comparative pollination effectiveness among bees  
330 (Hymenoptera: Apoidea) on lowbush blueberry (Ericaceae: *Vaccinium angustifolium*). *Ann*  
331 *Entomol Soc Am.* 2002;95: 345–351.
- 332 8. Mackenzie KE, Eickwort GC. Diversity and abundance of bees (Hymenoptera: Apoidea)  
333 foraging on highbush blueberry (*Vaccinium corymbosum* L.) in central New York. *J Kansas*  
334 *Entomol Soc.* 1996;69: 185–194.

- 335 9. Campbell JW, O'Brien J, Irvin JH, Kimmel CB, Daniels JC, Ellis JD. Managed bumble bees  
336 (*Bombus impatiens*) (Hymenoptera: Apidae) caged with blueberry bushes at high density did  
337 not increase fruit set or fruit weight compared to open pollination. *Environ Entomol.* 2017;46:  
338 237–242.
- 339 10. Stubbs CS, Drummond FA. *Bombus impatiens* (Hymenoptera: Apidae): an alternative to *Apis*  
340 *mellifera* (Hymenoptera: Apidae) for lowbush blueberry pollination. *J Econ Entomol.* 2001;94:  
341 609–616.
- 342 11. Cane JH, Payne JA. Regional, annual, and seasonal variation in pollinator guilds: intrinsic traits  
343 of bees (Hymenoptera: Apoidea) underlie their patterns of abundance at *Vaccinium ashei*  
344 (Ericaceae). *Ann Entomol Soc Am.* 1993;56: 577–588.
- 345 12. De Luca PA, Vallejo-Marín M. What's the “buzz” about? The ecology and evolutionary  
346 significance of buzz-pollination. *Curr Opin Plant Biol.* 2013;16: 429–435.
- 347 13. Buchmann SL, Jones CE, Little RJ. Buzz pollination in angiosperms. *Handbook of experimental*  
348 *pollination biology.* New York, NY, USA: Van Nostrand Reinhold Company; 1983. pp. 73–113.
- 349 14. Fulton M, Jesson LK, Bobiwash K, Schoen DJ. Mitigation of pollen limitation in the lowbush  
350 blueberry agroecosystem: effect of augmenting natural pollinators. *Ecosphere.* 2015;6: 1–19.
- 351 15. Isaacs R, Kirk AK. Pollination services provided to small and large highbush blueberry fields by  
352 wild and managed bees. *J Appl Ecol.* 2010;47: 841–849.
- 353 16. Lang G a, Danka RG. Honey-bee mediated cross- versus self-pollination of ‘Sharpblue’  
354 blueberry increases fruit size and hastens ripening. *J Am Soc Hortic Sci.* 1991;116: 770–773.
- 355 17. Velthuis HHW, van Doorn A. A century of advances in bumblebee domestication and the  
356 economic and environmental aspects of its commercialization for pollination. *Apidologie.*  
357 2006;37: 421–451.

- 358 18. Winter K, Adams L, Thorp R, Inouye DW, Day L, Ascher J, et al. Importation of non-native  
359 bumble bees into North America: potential consequences of using *Bombus terrestris* and  
360 other non-native bumble bees for greenhouse crop pollination in Canada, Mexico, and the  
361 United States [Internet]. A White Paper of the North American Pollinator Protecting  
362 Campaign. 2006.
- 363 19. Inoue MN, Yokoyama J. Competition for flower resources and nest sites between *Bombus*  
364 *terrestris* (L.) and Japanese native bumblebees. *Appl Entomol Zool.* 2010;45: 29–35.
- 365 20. Goka K. Introduction to the special feature for ecological risk assessment of introduced  
366 bumblebees: status of the European bumblebee, *Bombus terrestris*, in Japan as a beneficial  
367 pollinator and an invasive alien species. *Appl Entomol Zool.* 2010;45: 1–6.
- 368 21. Aizen MA, Smith-Ramírez C, Morales CL, Vieli L, Sáez A, Barahona-Segovia RM, et al.  
369 Coordinated species importation policies are needed to reduce serious invasions globally: the  
370 case of alien bumblebees in South America. *J Appl Ecol.* 2018; 1–7.
- 371 22. Morales CL, Arbetman MP, Cameron SA, Aizen MA. Rapid ecological replacement of a native  
372 bumble bee by invasive species. *Front Ecol Environ.* 2013;11: 529–534.
- 373 23. Geslin B, Morales CL. New records reveal rapid geographic expansion of *Bombus terrestris*  
374 Linnaeus, 1758 (Hymenoptera: Apidae), an invasive species in Argentina. *Check List.* 2015;11:  
375 1620.
- 376 24. Schmid-Hempel R, Eckhardt M, Goulson D, Heinzmann D, Lange C, Plischuk S, et al. The  
377 invasion of southern South America by imported bumblebees and associated parasites. *J*  
378 *Anim Ecol.* 2014;83: 823–837.
- 379 25. Palau M, Bargain V, Valenzuela M del M, Leebutterworth D, Bammatoua N, Mishina A, et al.  
380 All about blueberries in Latin America. Eurofresh Distribution. 2016: 38.
- 381 26. Sampson B, Cane J. Pollination efficiencies of three bee (Hymenoptera: Apoidea) species

- 382           visiting rabbiteye blueberry. *J Econ Entomol.* 2000;93: 1726–1731.
- 383    27.    Hoffman GD, Lande C, Rao S. A novel pollen transfer mechanism by honey bee foragers on  
384           highbush blueberry (Ericales: Ericaceae). *Environ Entomol.* 2018;47: 1465–1470.
- 385    28.    Gibbs J, Elle E, Bobiwash K, Haapalainen T, Isaacs R. Contrasting pollinators and pollination in  
386           native and non-native regions of highbush blueberry production. *PLoS One.* 2016;11: 1–24.
- 387    29.    Sobekova K, Thomsen MR, Ahrendsen BL. Market trends and consumer demand for fresh  
388           berries. *Agroinform Publ House.* 2013;2: 11–14.
- 389    30.    Nicholson CC, Ricketts TH. Wild pollinators improve production, uniformity, and timing of  
390           blueberry crops. *Agric Ecosyst Environ.* Elsevier; 2019;272: 29–37.
- 391    31.    Nakagawa S, Schielzeth H. A general and simple method for obtaining R<sup>2</sup> from generalized  
392           linear mixed-effects models. *Methods Ecol Evol.* 2013;4: 133–142.
- 393    32.    R Core Team. R: a language and environment for statistical computing [Internet]. Vienna;  
394           2017. Available: <https://www.r-project.org/>
- 395    33.    Pineiro J, Bates D, DebRoy S, Sarkar D, Team RC. Nlme: linear and nonlinear mixed effects  
396           models [Internet]. 2017. Available: <https://cran.r-project.org/package=nlme>
- 397    34.    Hothorn T, Bretz F, Westfall P. Simultaneous inference in general parametric models.  
398           *Biometrical J.* 2008;50: 346–363.
- 399    35.    Wickham H. Ggplot2: elegant graphics for data analysis. New York: Springer-Verlag; 2009.
- 400    36.    Lüdecke D. SjPlot: data visualization for statistics in social science [Internet]. 2017. Available:  
401           <https://cran.r-project.org/package=sjPlot>
- 402    37.    Fox J, Weisberg S. An {R} companion to applied regression. Second Edi. California: Sage; 2011.
- 403    38.    Bates D, Maechler M, Bolker B, Walker S. Fitting linear mixed-effects models using lme4. *J*

- 404 Stat Softw. 2015;67: 1–48.
- 405 39. Auguie B. GridExtra: miscellaneous functions for “grid” graphics [Internet]. 2017. Available:  
406 <https://cran.r-project.org/package=gridExtra>
- 407 40. Deepayan S. Lattice: multivariate data visualization with R. New York: Springer; 2008.
- 408 41. Barton K. MuMIn: multi-model inference [Internet]. 2017. Available: [https://cran.r-](https://cran.r-project.org/package=MumIn)  
409 [project.org/package=MumIn](https://cran.r-project.org/package=MumIn)
- 410 42. Wickham H. The split-apply-combine strategy for data analysis. J Stat Softw. 2011;40: 1–29.
- 411 43. Lemon J. Plotrix: a package in the red light district of R. R-News. 2006;6: 8–12.
- 412 44. Courcelles DMM, Button L, Elle E. Bee visit rates vary with floral morphology among highbush  
413 blueberry cultivars (*Vaccinium corymbosum* L.). J Appl Entomol. 2013;137: 693–701.
- 414

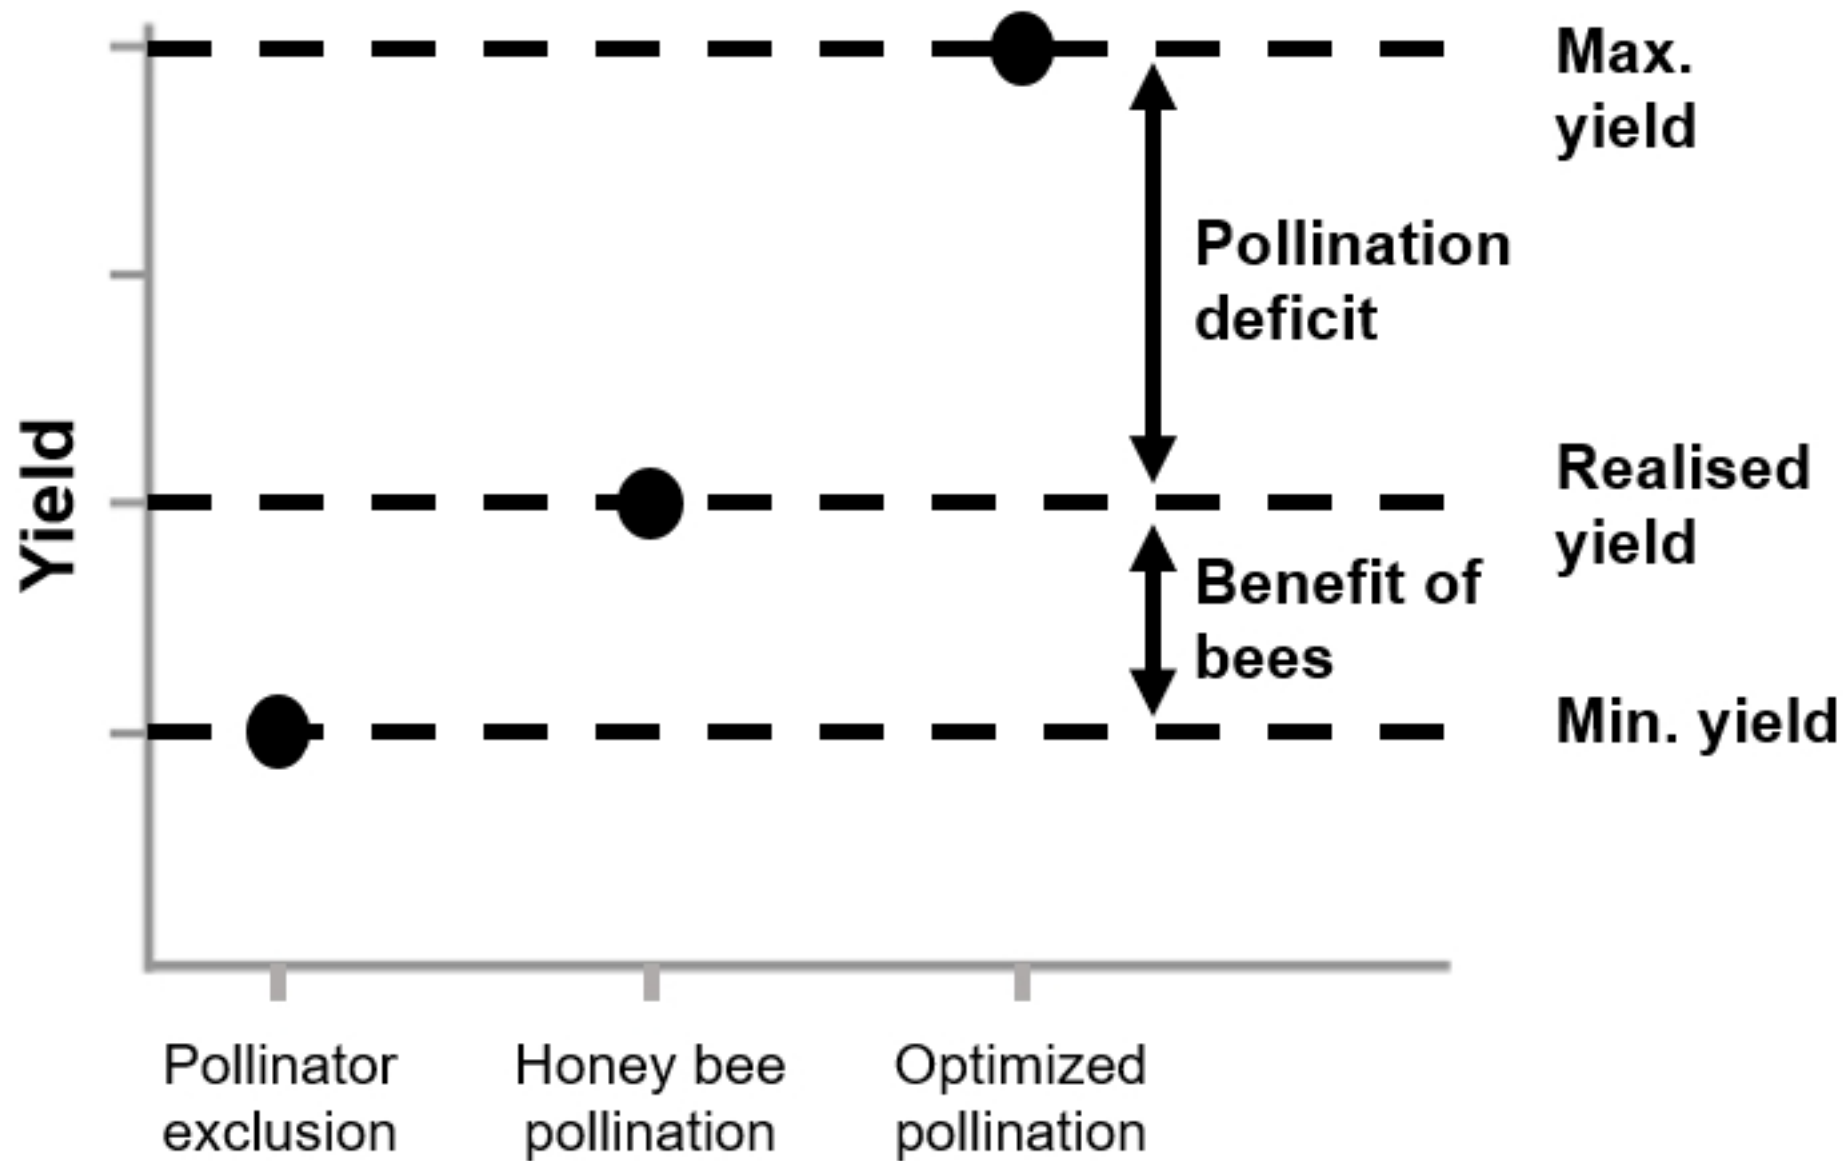

Figure

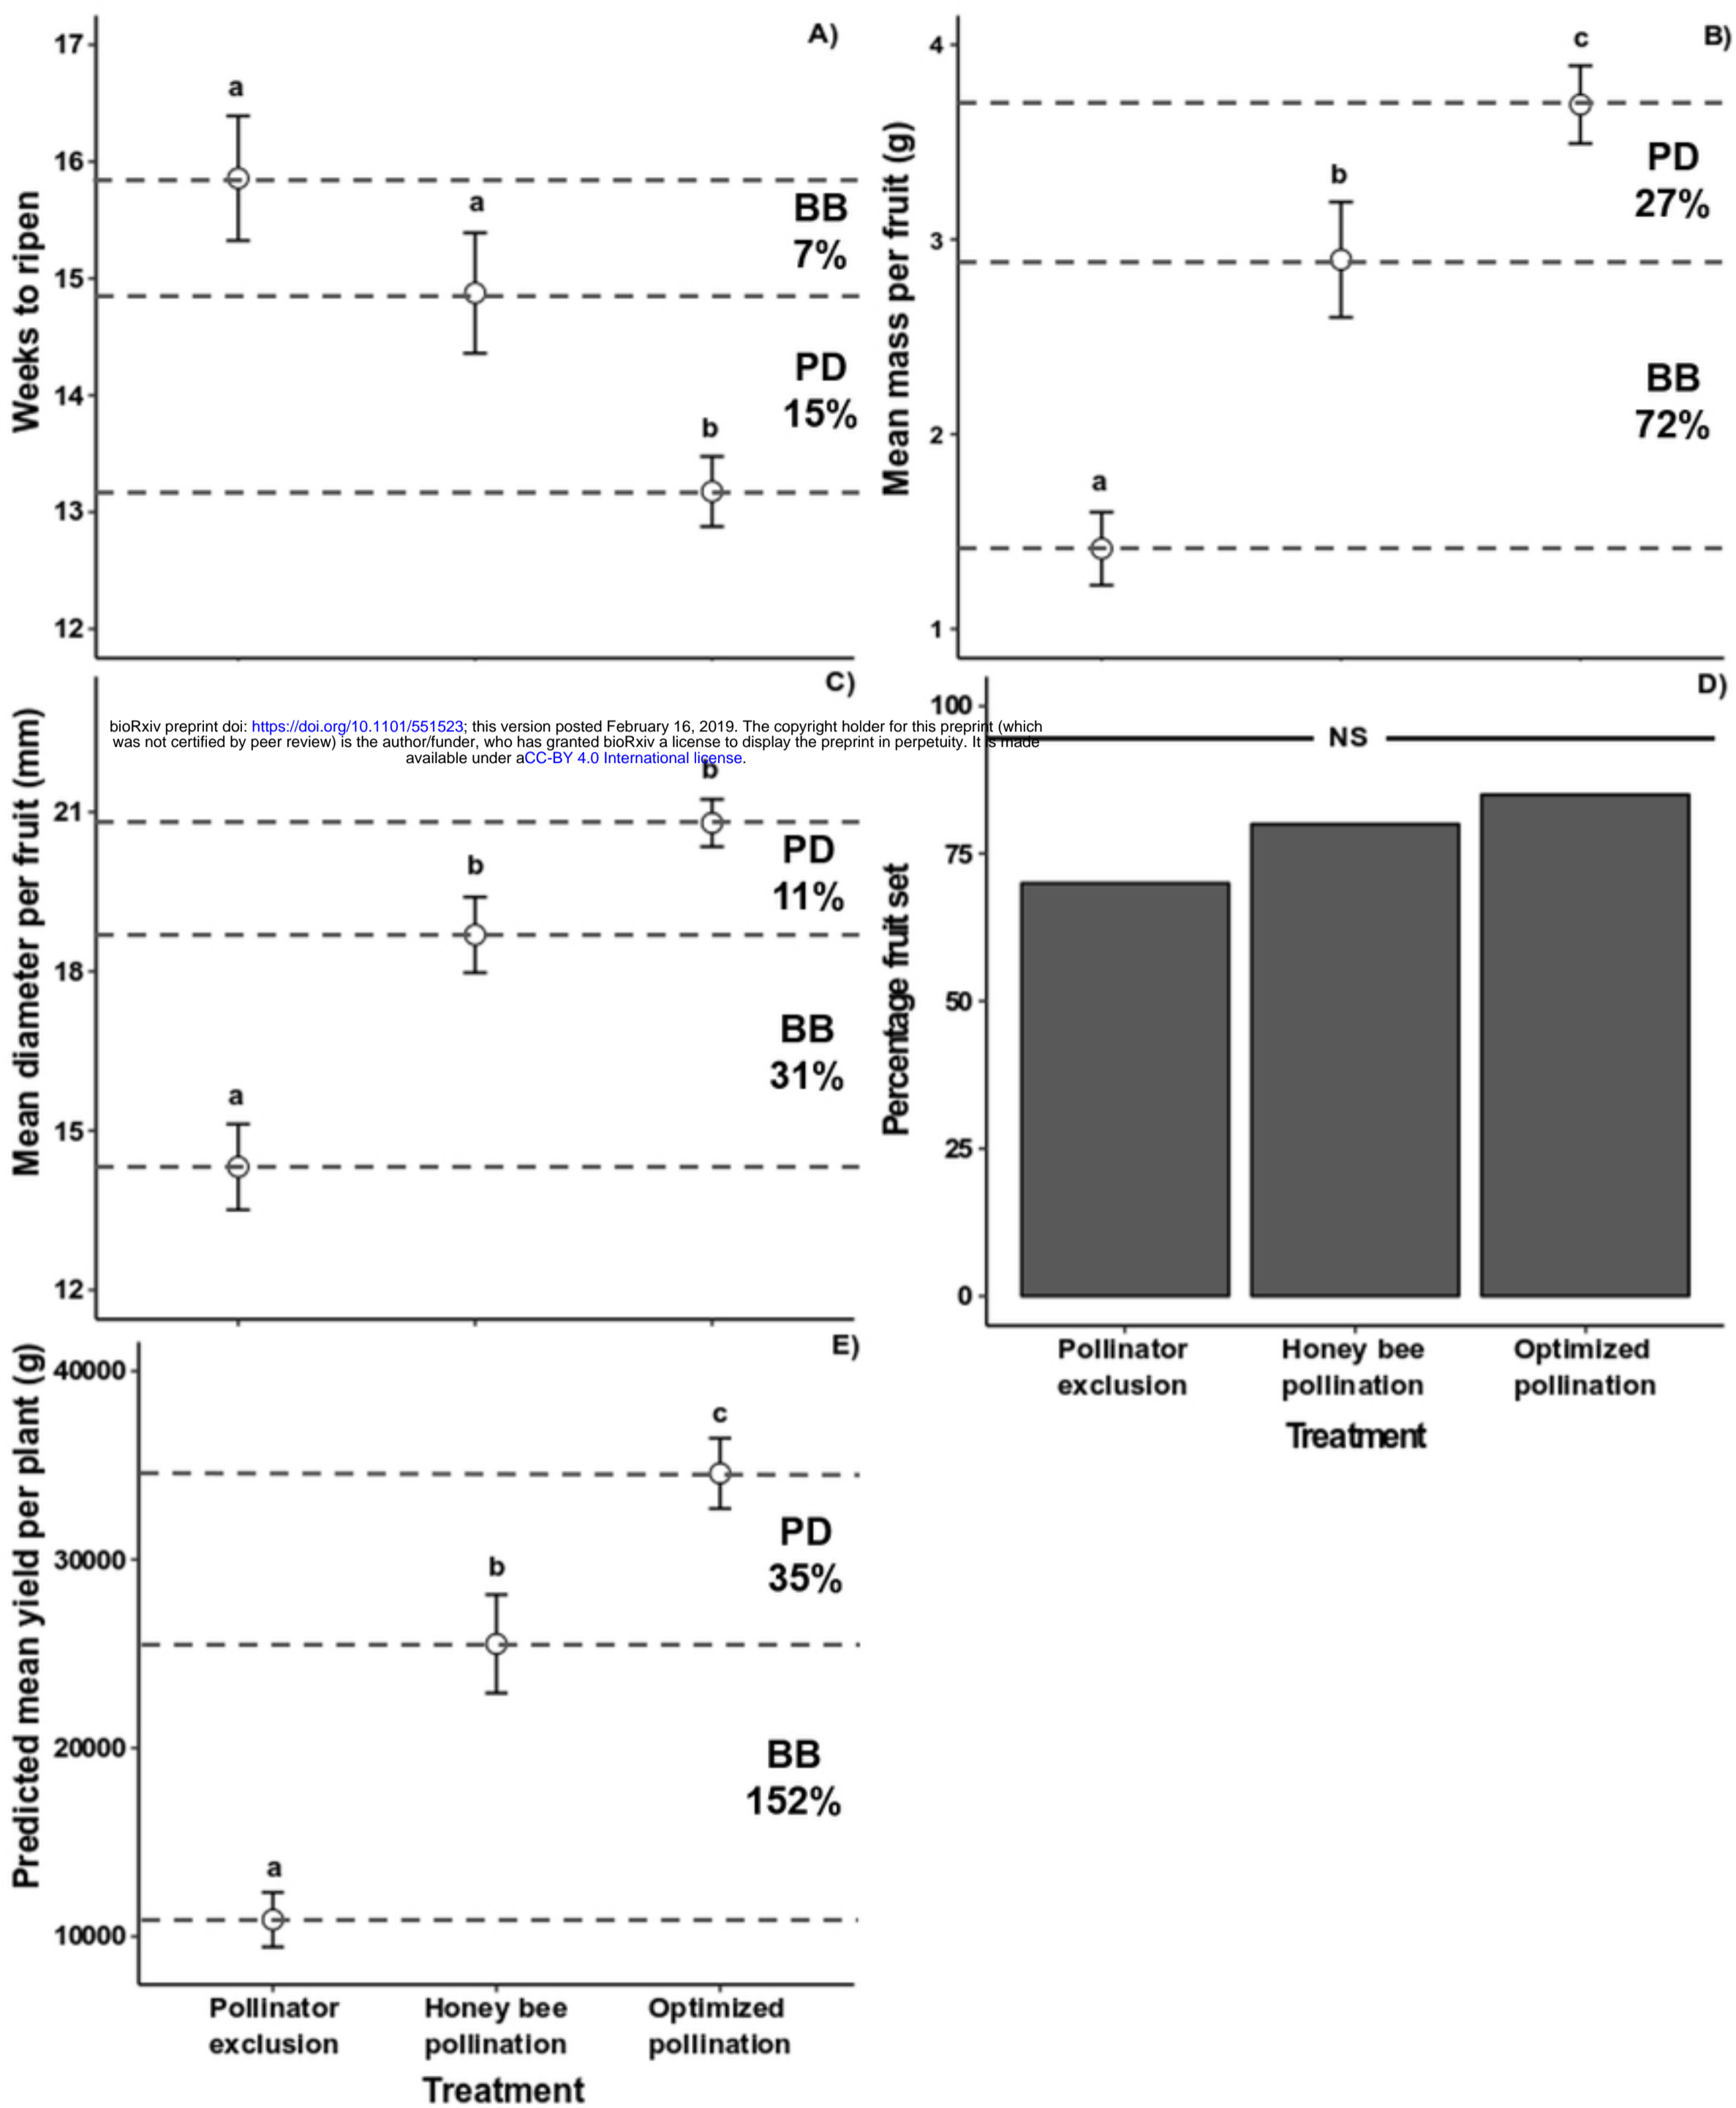

Figure
